# Supplementary material for: Bias as a source of inconsistency in ivermectin trials for COVID-19: A systematic review
Source: bioRxiv or medRxiv preprint supplement (doi:10.1101/2021.08.19.21262304), 2021-08-21

**S9 Figure. Comparison: ivermectin vs. Standard of care; Outcome: mortality; Analysis: subgroups by intervention implemented.**

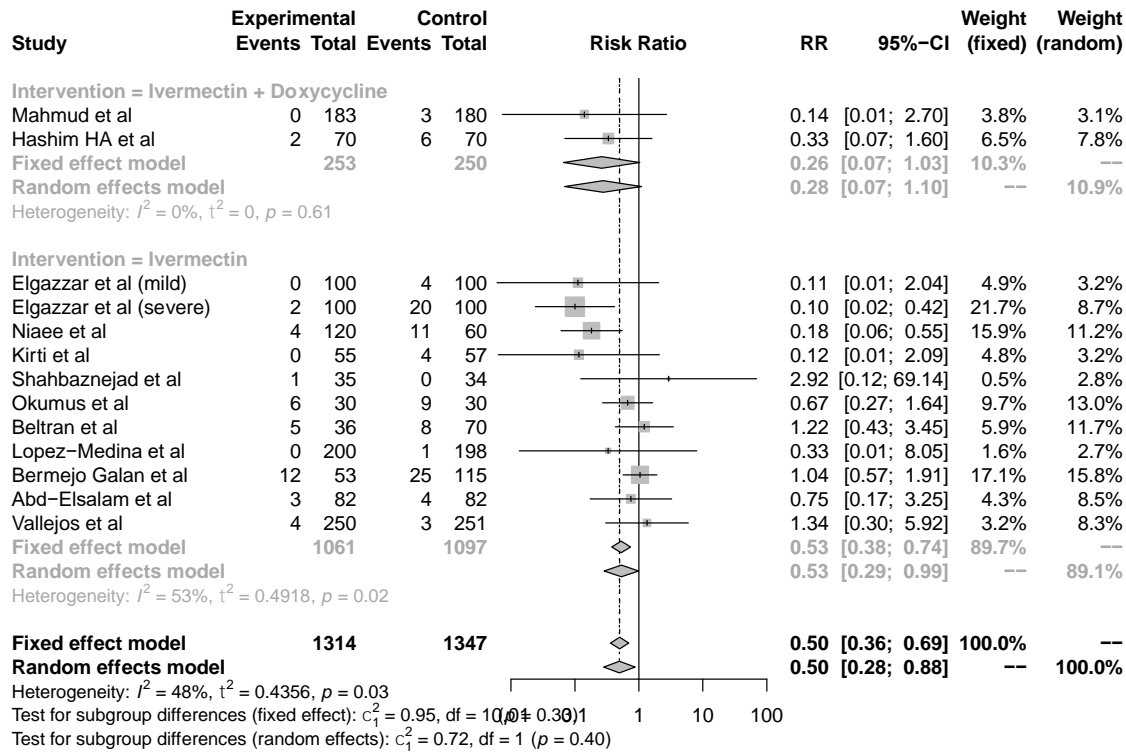

**S10 Figure. Comparison: ivermectin vs. Standard of care; Outcome: mortality; Analysis: subgroups by control implemented.**

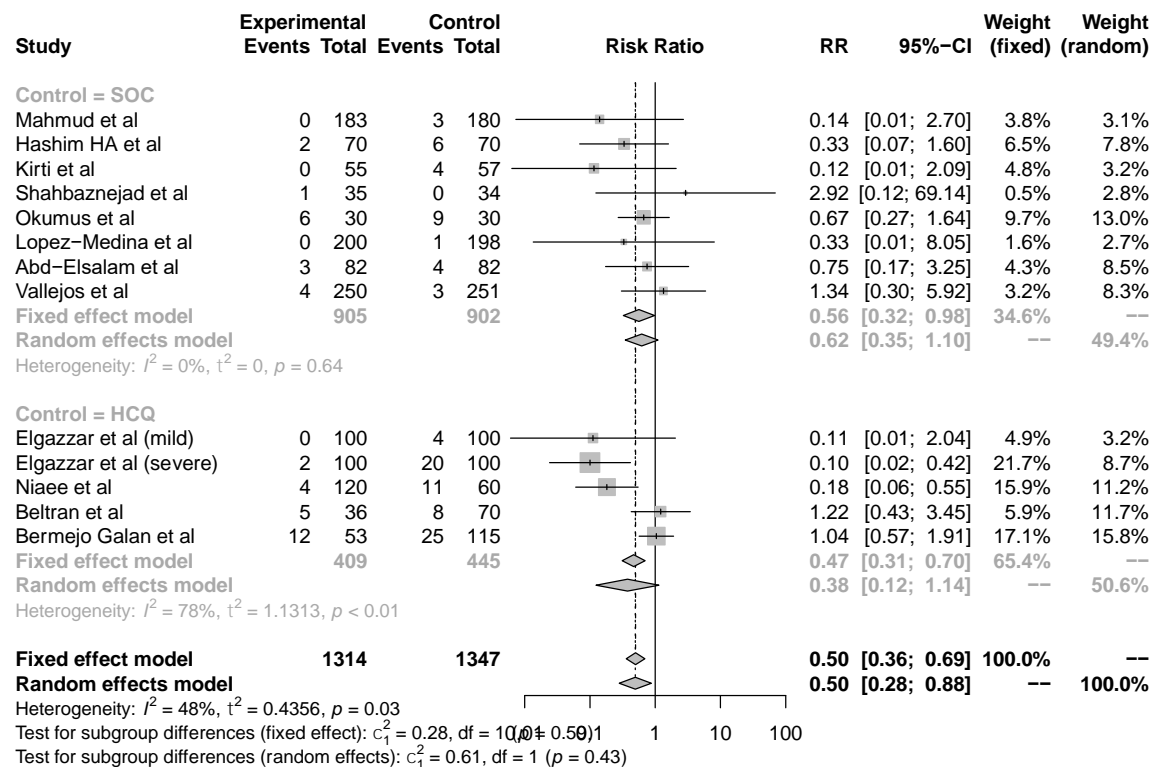

**S11 Figure. Comparison: ivermectin vs. Standard of care; Outcome: mortality; Analysis: subgroups by disease severity.**

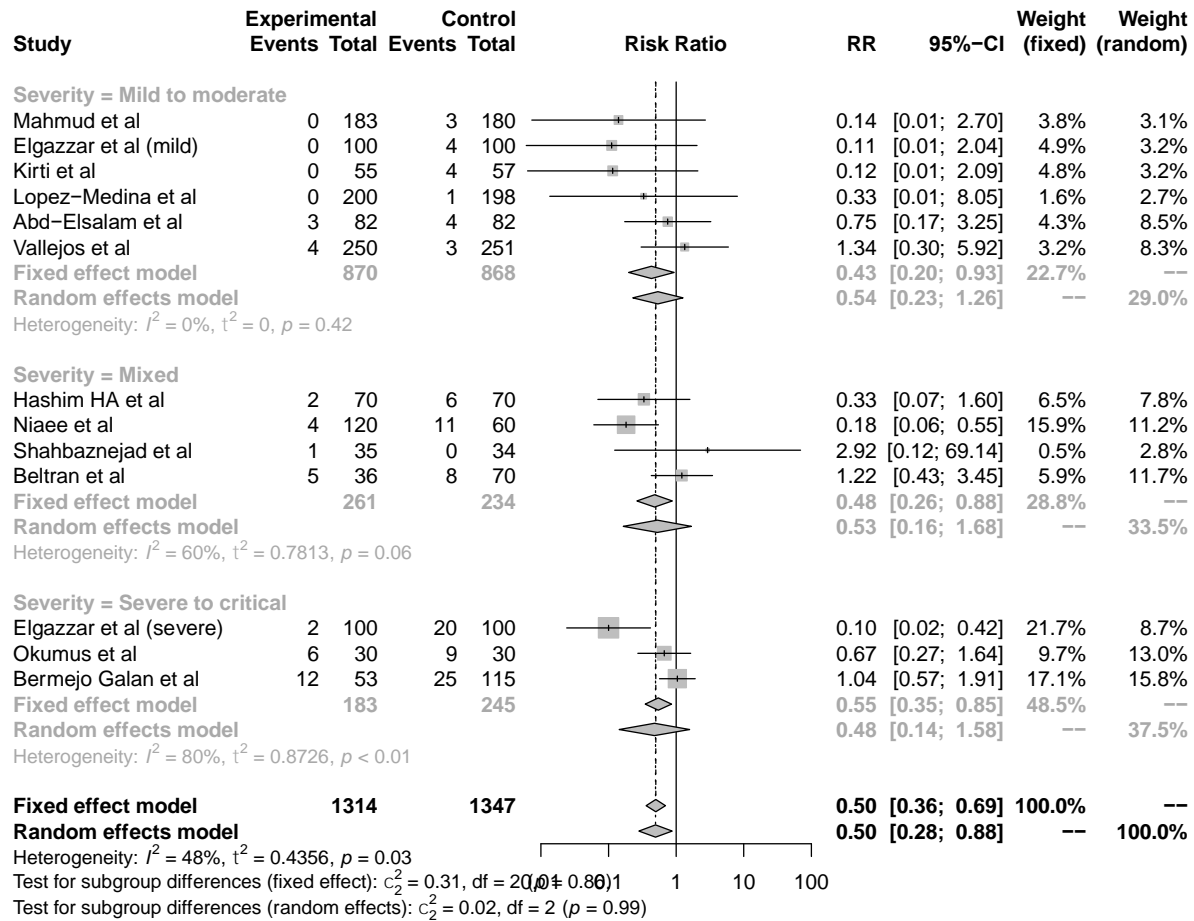

**S12 Figure. Comparison: ivermectin vs. Standard of care; Outcome: mechanical ventilation; Analysis: subgroups by intervention implemented.**

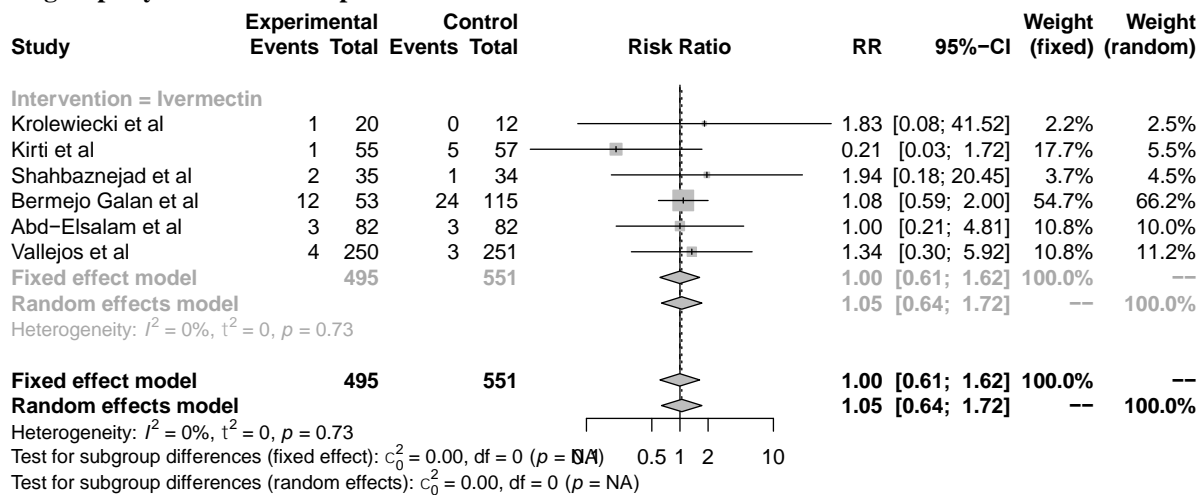

**S13 Figure Comparison: ivermectin vs. Standard of care; Outcome: mechanical ventilation; Analysis: subgroups by control implemented.**

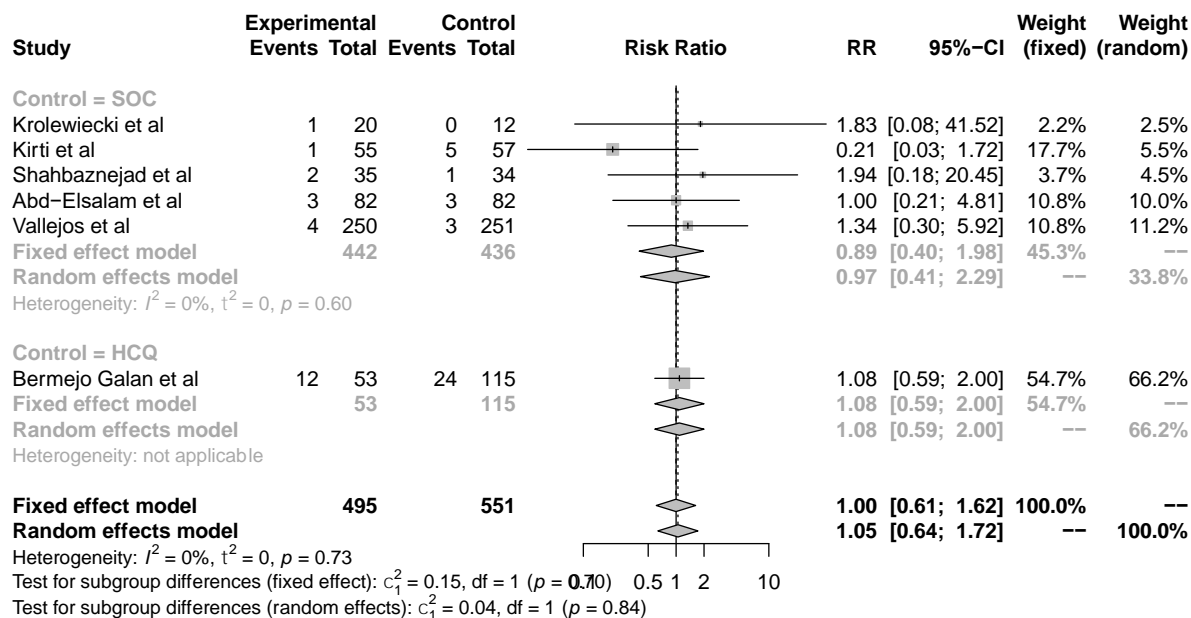

**S14 Figure. Comparison: ivermectin vs. Standard of care; Outcome: mechanical ventilation; Analysis: subgroups by disease severity.**

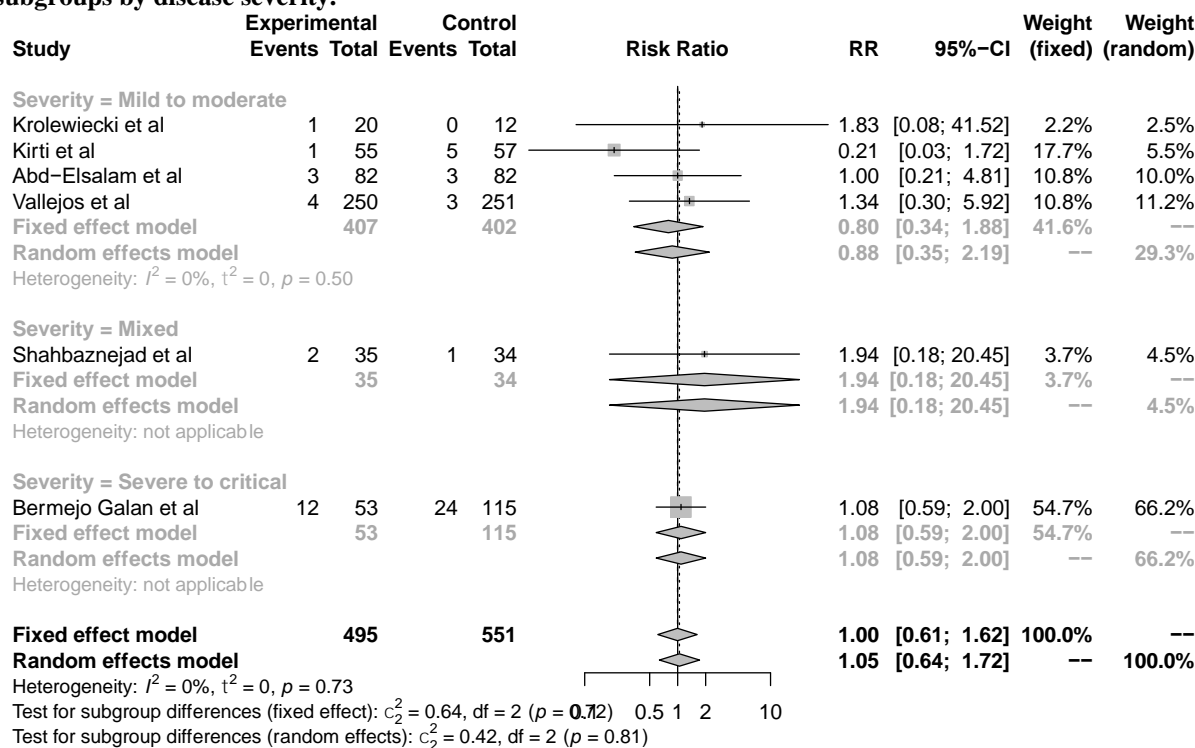

**S15 Figure. Comparison: ivermectin vs. Standard of care; Outcome: symptom resolution or improvement; Analysis: subgroups by intervention implemented.**

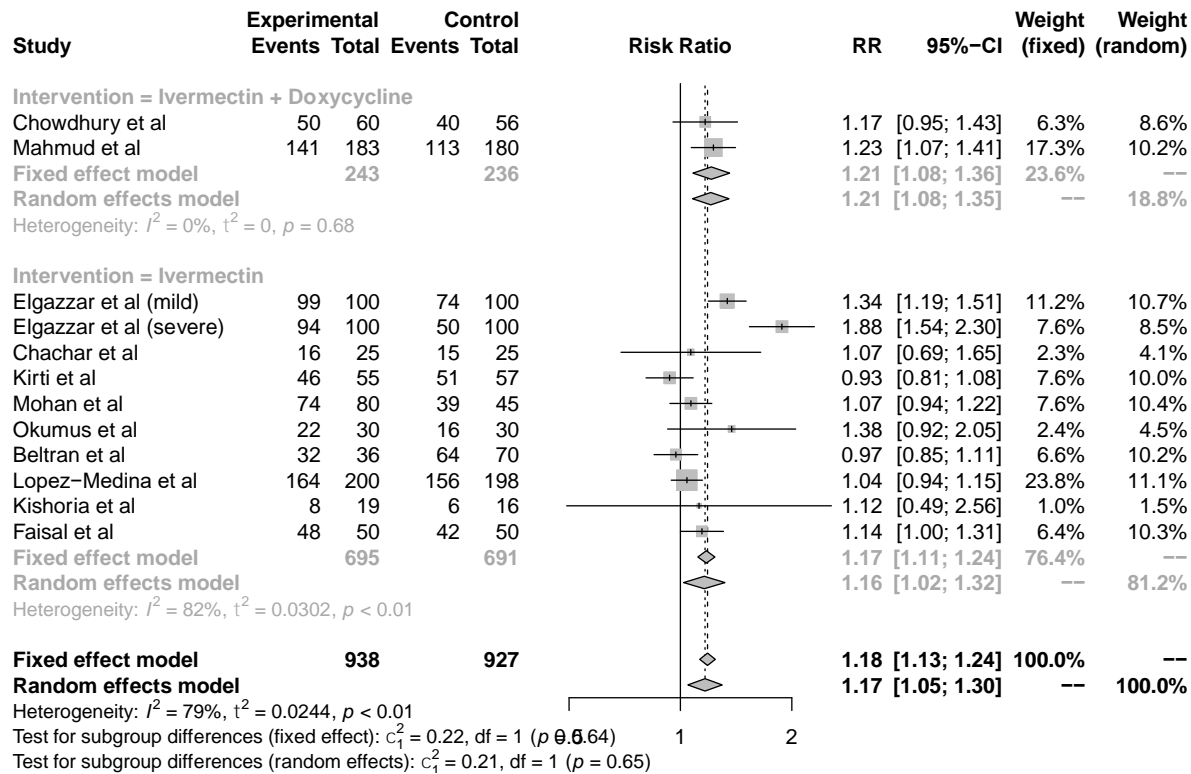

**S16 Figure. Comparison: ivermectin vs. Standard of care; Outcome: symptom resolution or improvement; Analysis: subgroups by control implemented.**

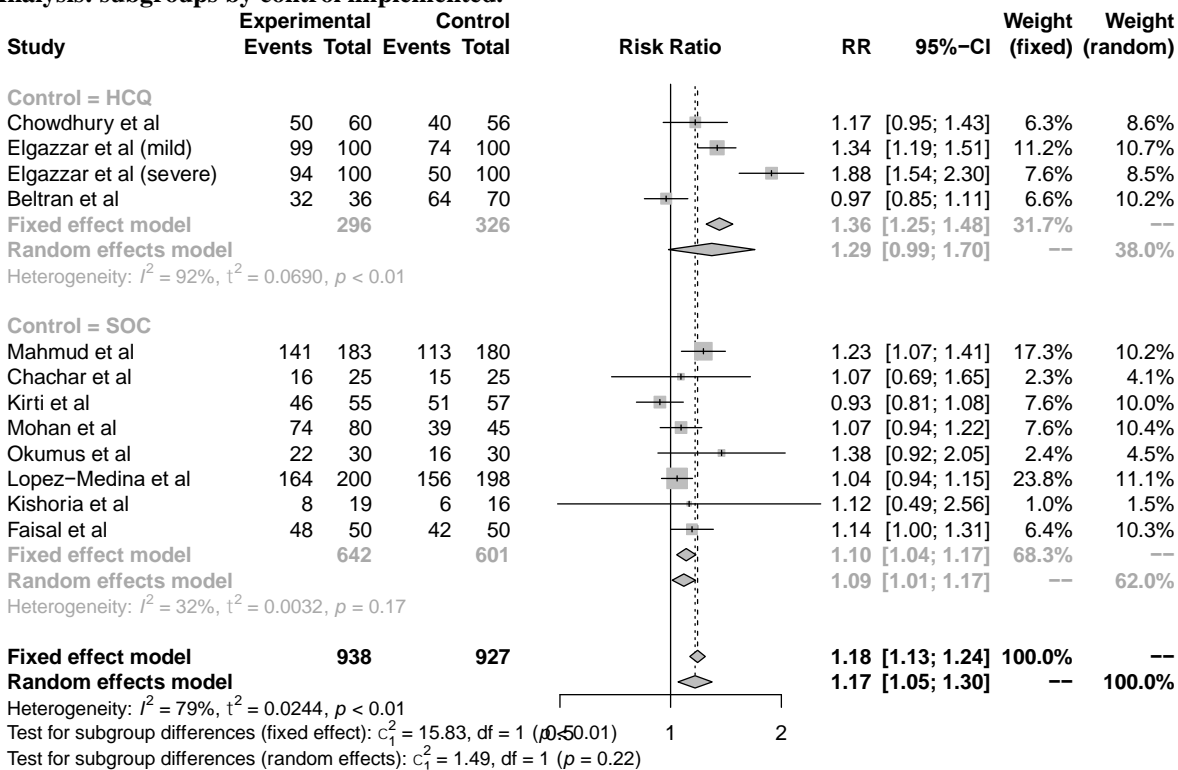

**S17 Figure. Comparison: ivermectin vs. Standard of care; Outcome: symptom resolution or improvement; Analysis: subgroups by disease severity.**

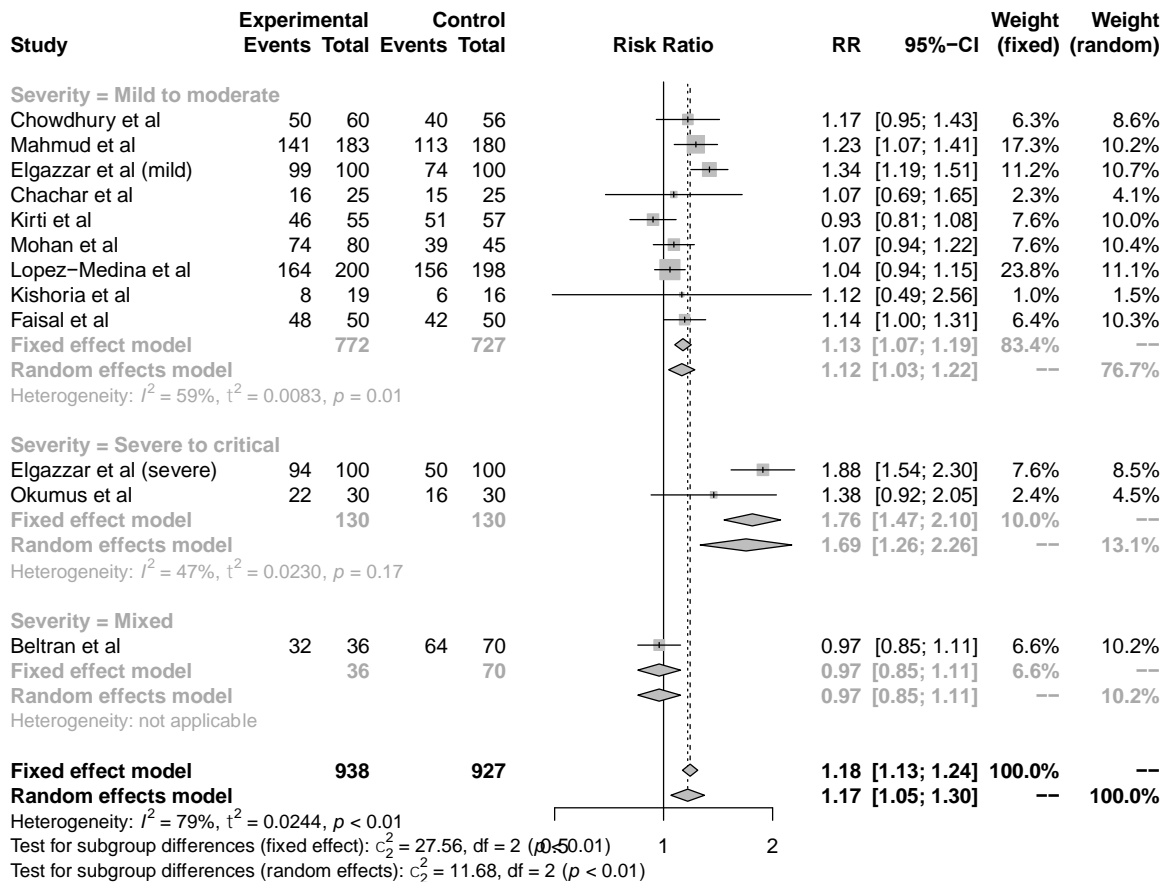

**S18 Figure. Comparison: ivermectin vs. Standard of care; Outcome: symptom resolution or improvement; Analysis: subgroups by outcome measurement time frame.**

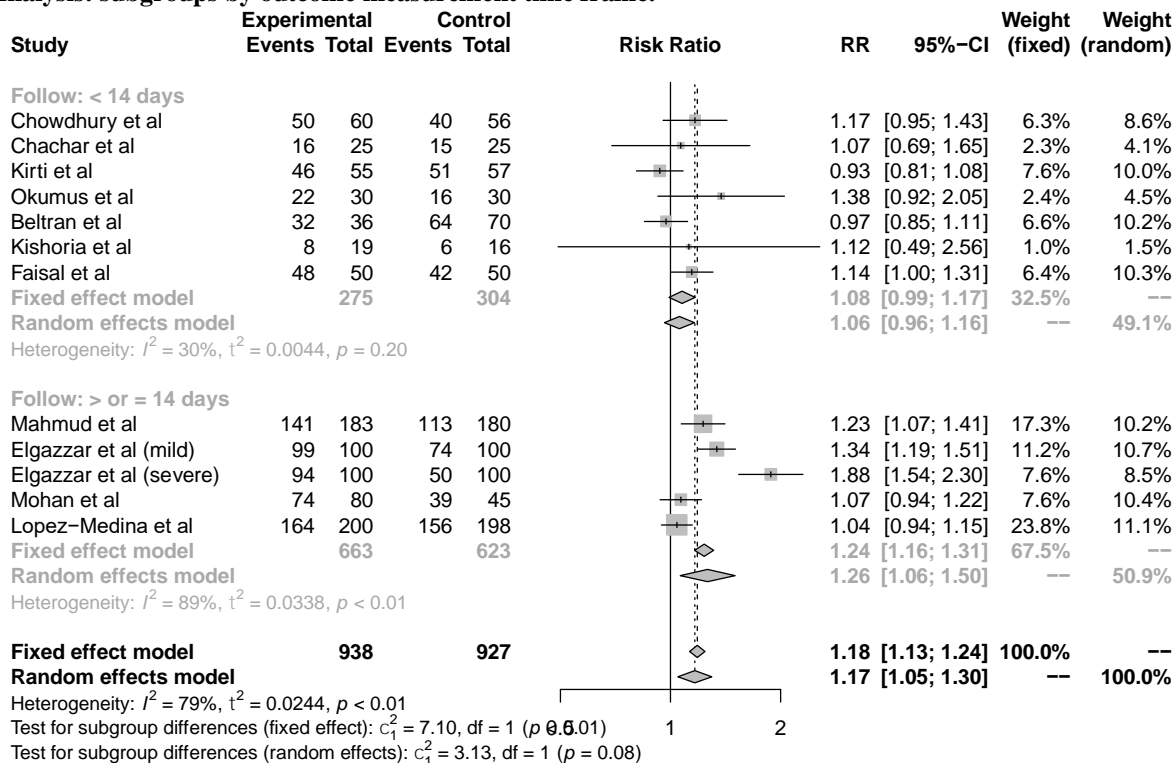

**S19 Figure. Comparison: ivermectin vs. Standard of care; Outcome: hospitalization; Analysis: subgroups by intervention implemented.**

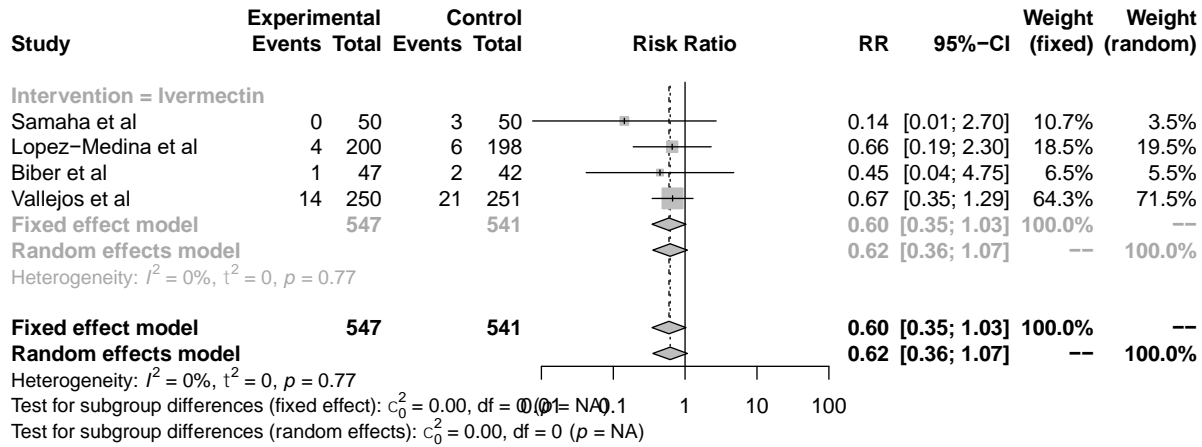

**S20 Figure. Comparison: ivermectin vs. Standard of care; Outcome: hospitalization; Analysis: subgroups by control implemented.**

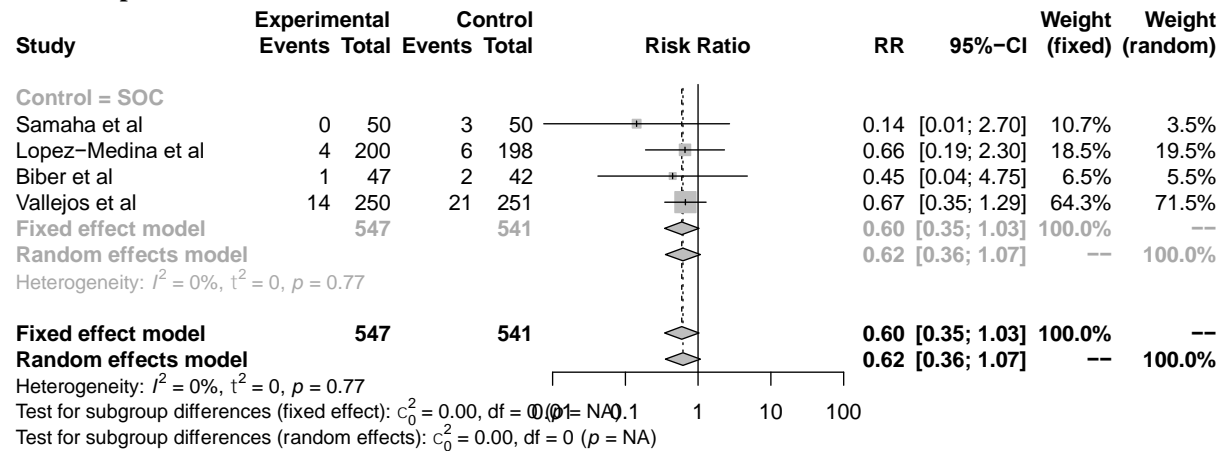

**S21 Figure. Comparison: ivermectin vs. Standard of care; Outcome: hospitalization; Analysis: subgroups by disease severity.**

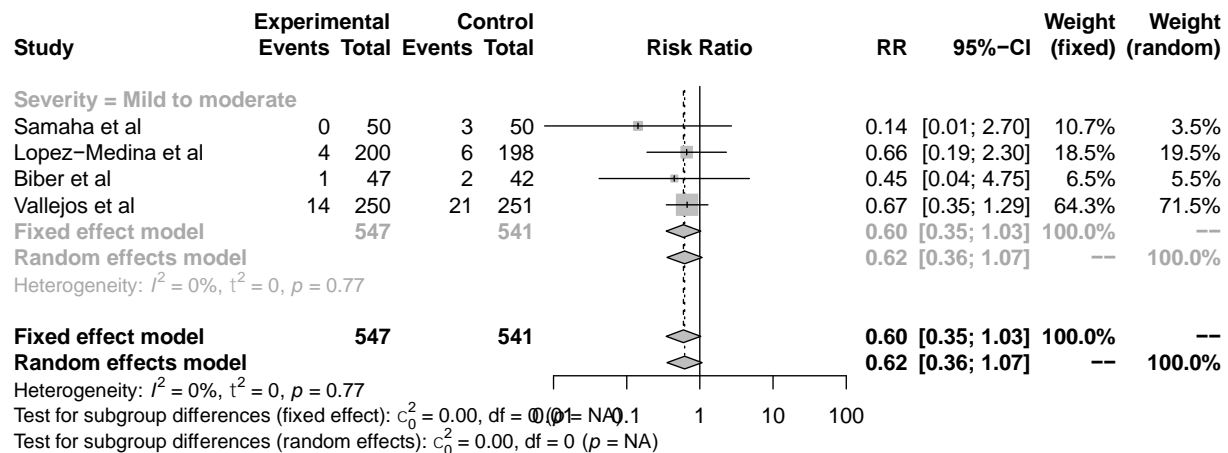

**S22 Figure. Comparison: ivermectin vs. Standard of care; Outcome: infection; Analysis: subgroups by intervention implemented.**

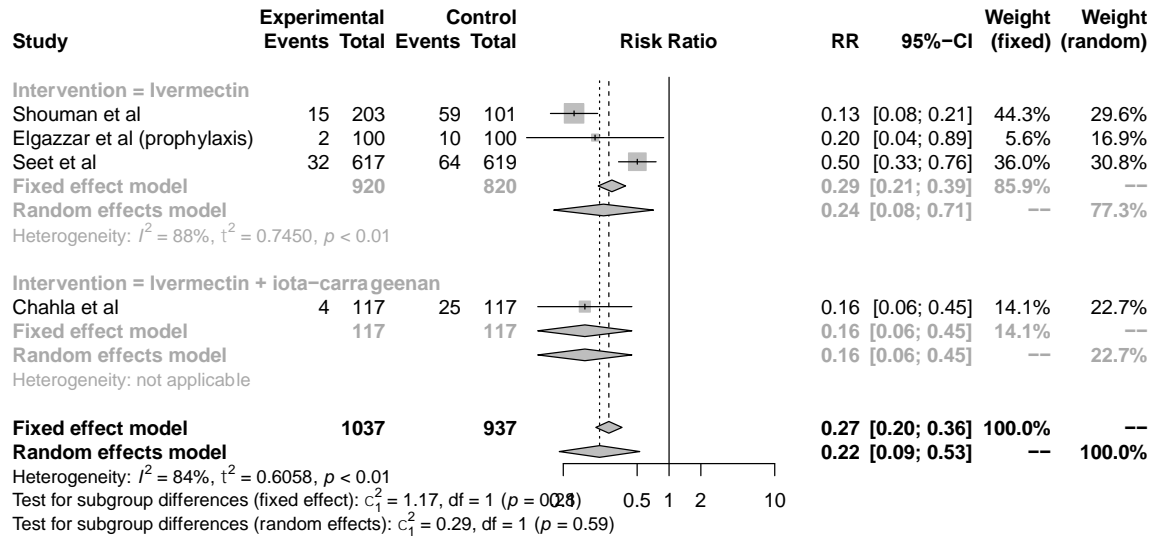

**S23 Figure. Comparison: ivermectin vs. Standard of care; Outcome: infection; Analysis: subgroups by control implemented.**

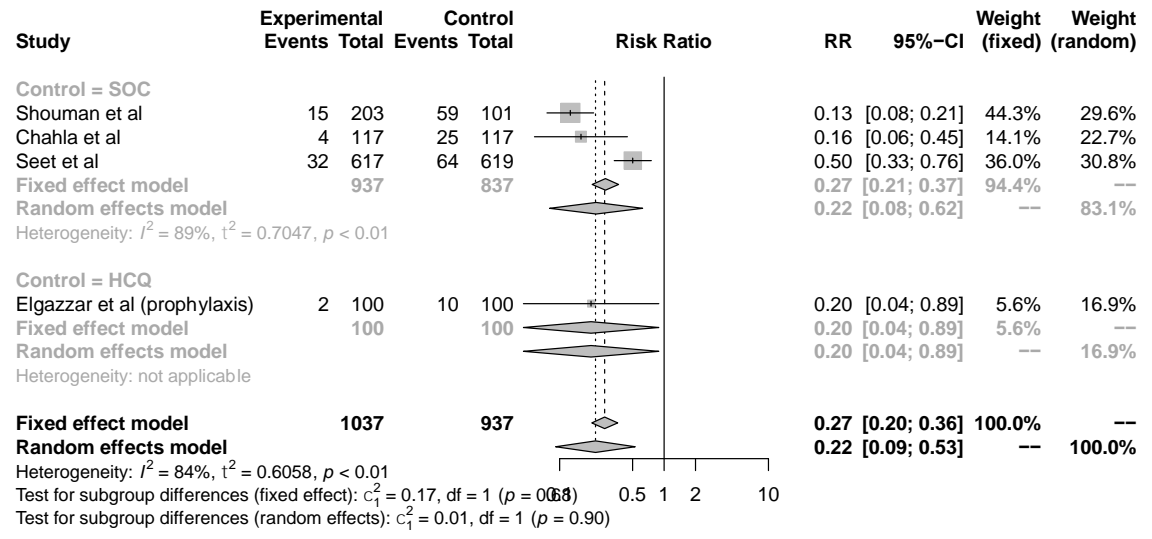

**S24 Figure. Comparison: ivermectin vs. Standard of care; Outcome: viral clearance; Analysis: subgroups by intervention implemented.**

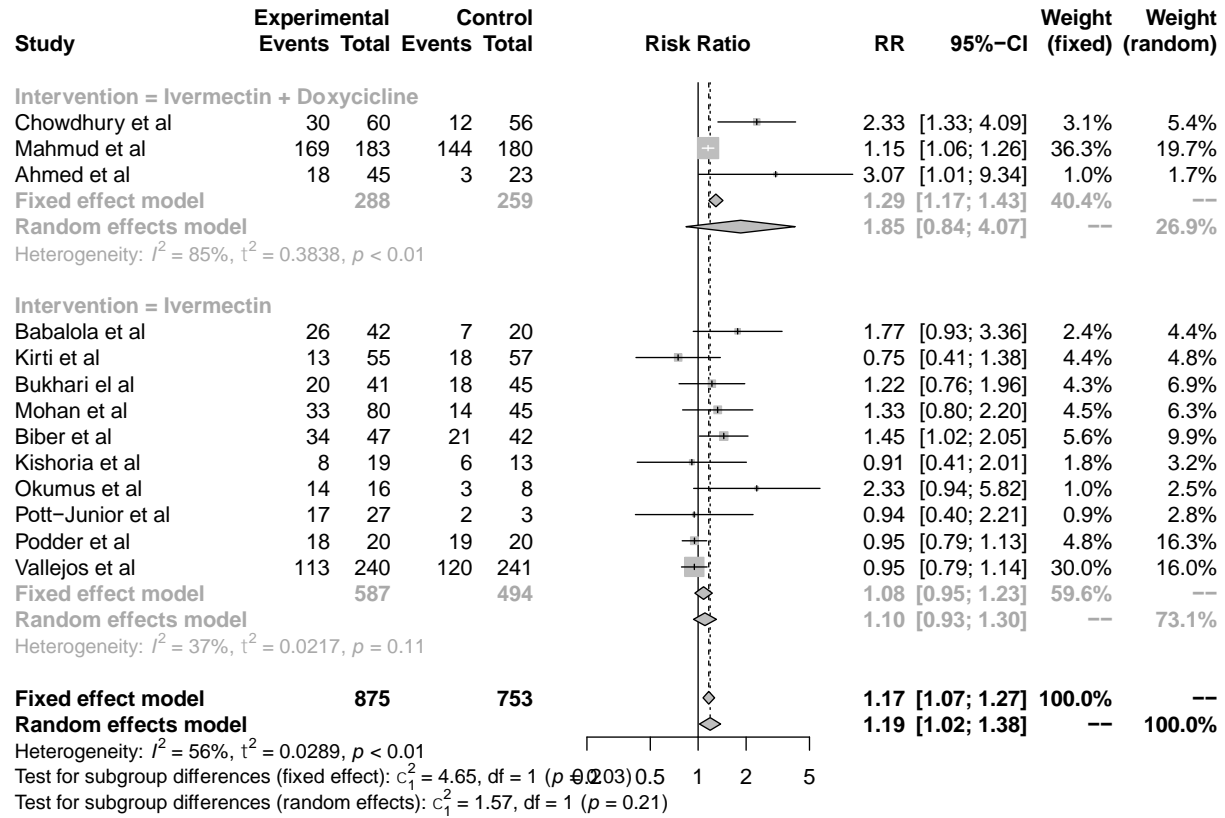

**S25 Figure. Comparison: ivermectin vs. Standard of care; Outcome: viral clearance; Analysis: subgroups by control implemented.**



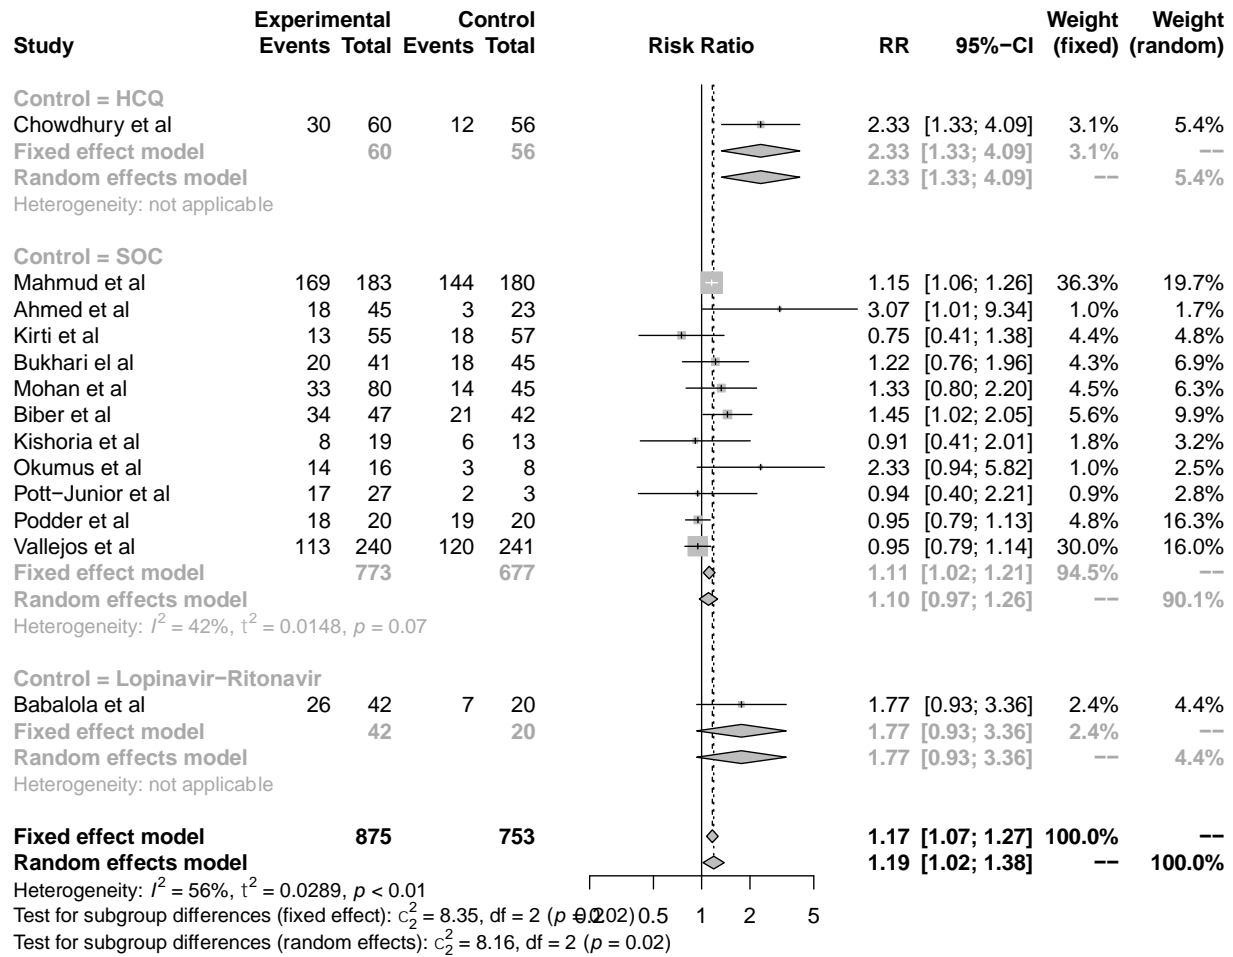

**S26 Figure. Comparison: ivermectin vs. Standard of care; Outcome: viral clearance; Analysis: subgroups by disease severity.**

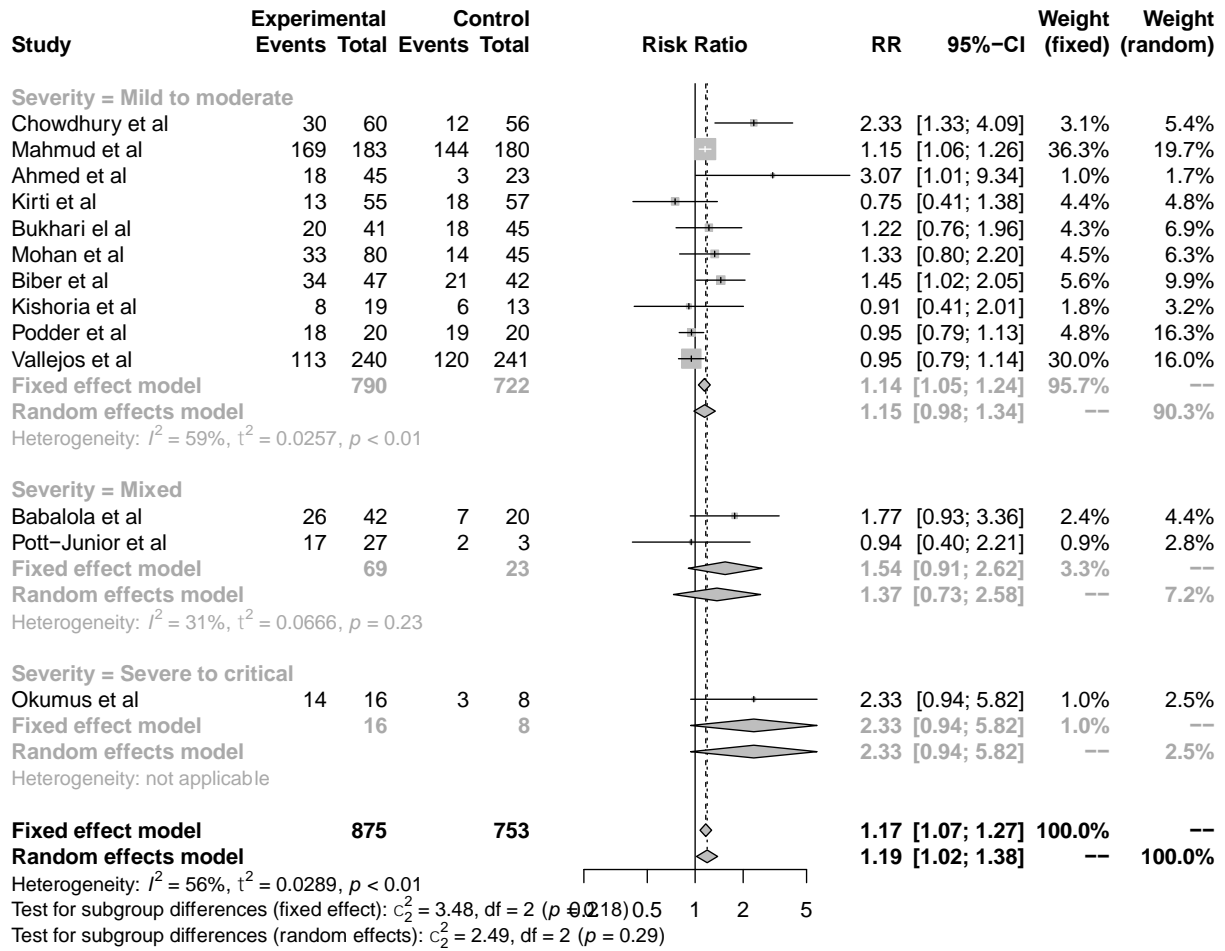

**S27 Figure. Comparison: ivermectin vs. Standard of care; Outcome: viral clearance; Analysis: subgroups by outcome measurement time frame.**

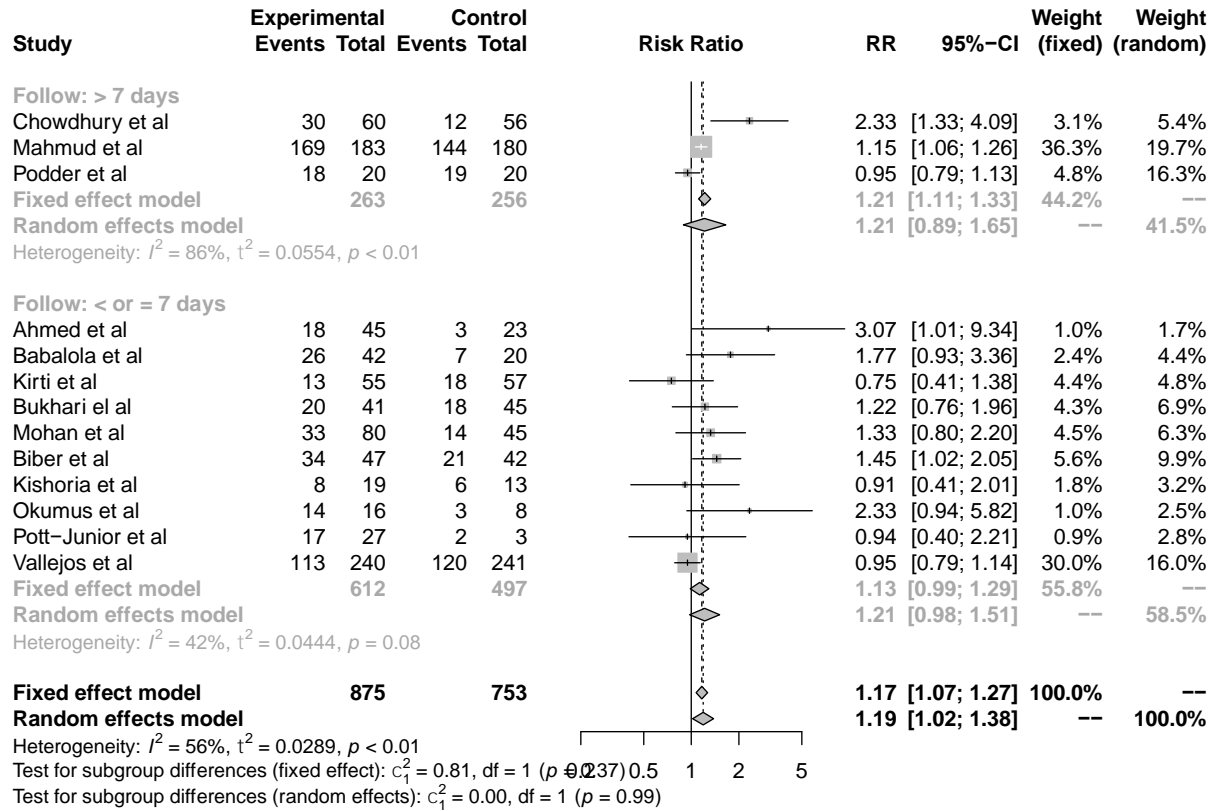

**S28 Figure. Comparison: ivermectin vs. Standard of care; Outcome: adverse events; Analysis: subgroups by intervention implemented.**

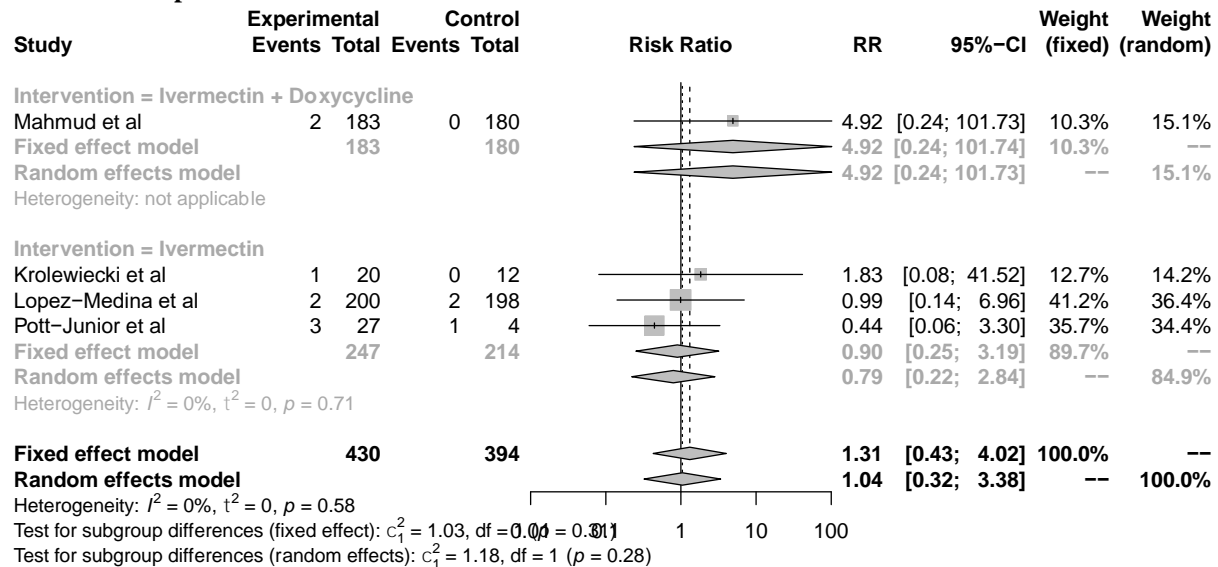

**S29 Figure. Comparison: ivermectin vs. Standard of care; Outcome: adverse events; Analysis: subgroups by control implemented.**

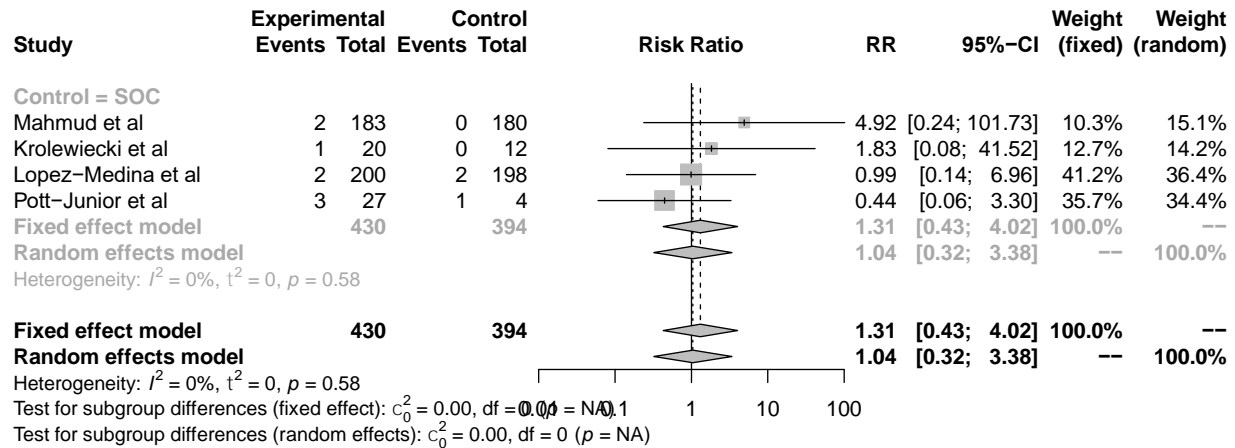

**S30 Figure. Comparison: ivermectin vs. Standard of care; Outcome: adverse events; Analysis: subgroups by disease severity.**

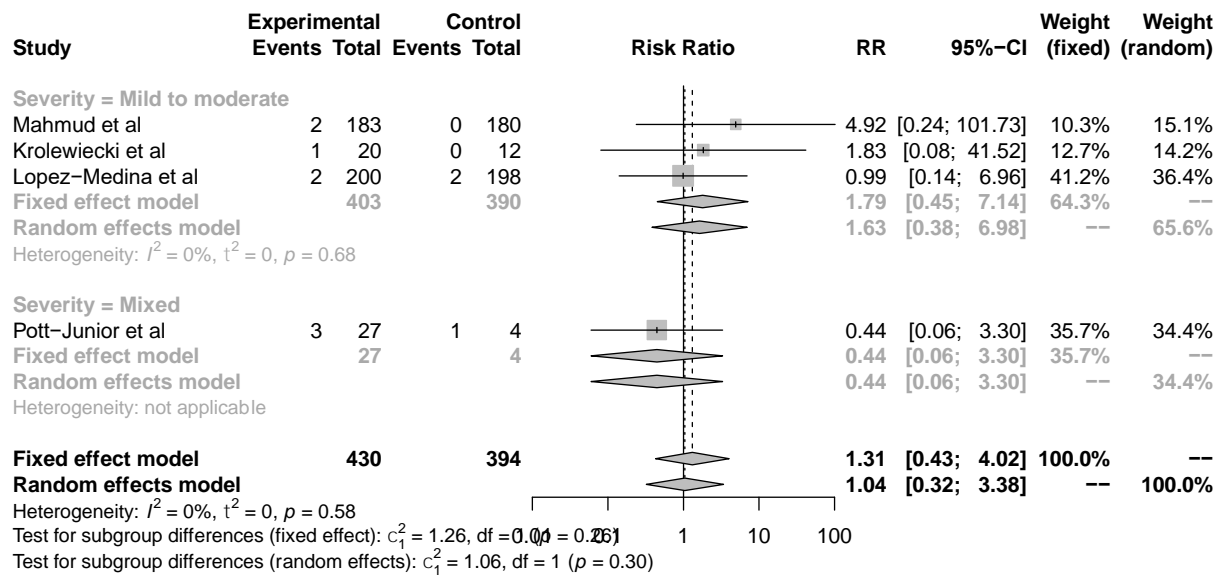

**S31 Figure. Comparison: ivermectin vs. Standard of care; Outcome: mortality; Analysis: risk of publication bias.**

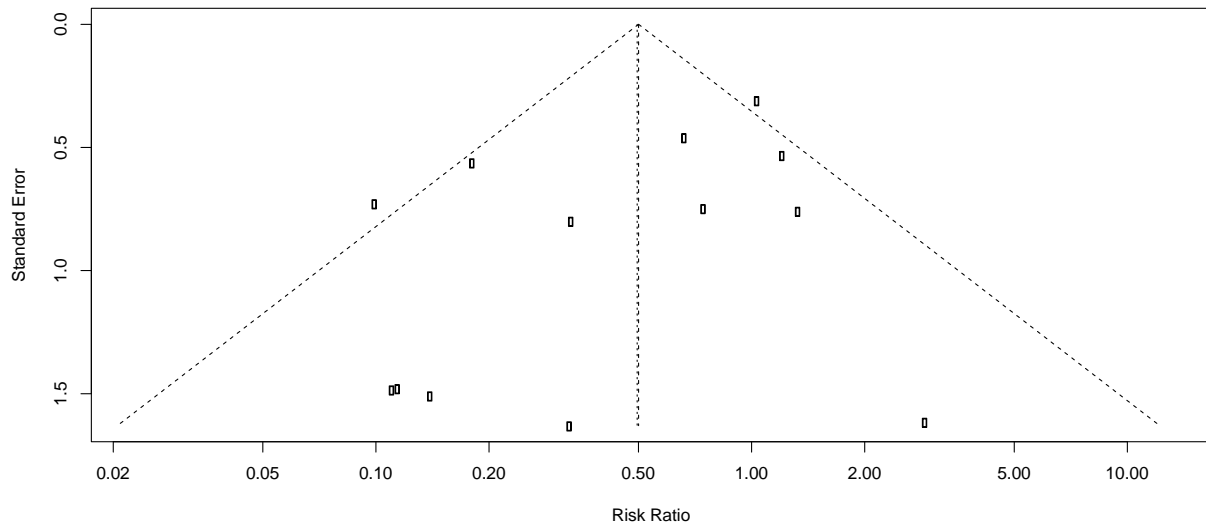

**S32 Figure. Comparison: ivermectin vs. Standard of care; Outcome: symptom resolution or improvement; Analysis: risk of publication bias.**

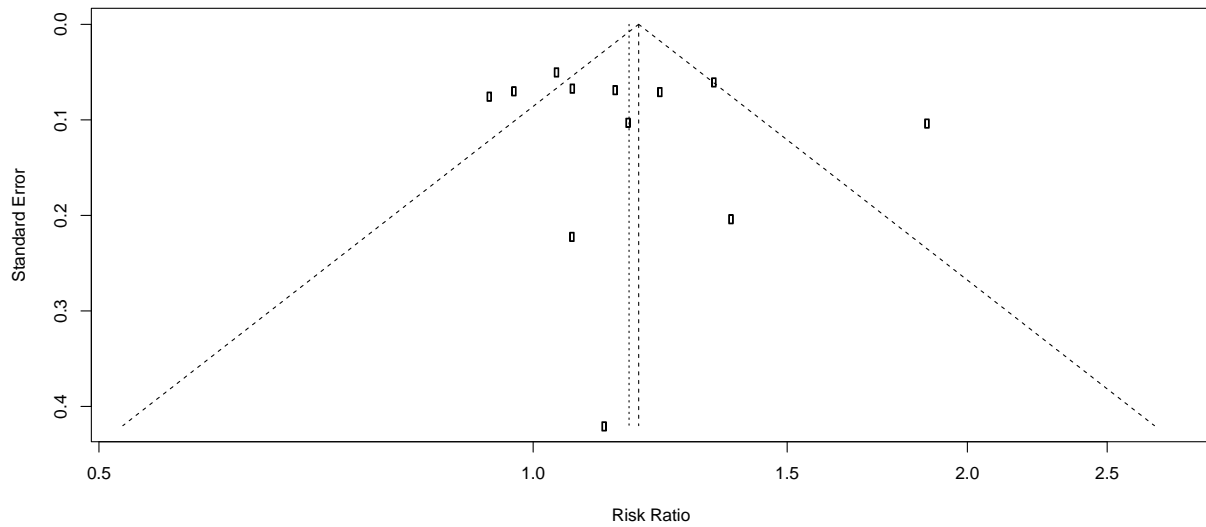

**S33 Figure. Comparison: ivermectin vs. Standard of care; Outcome: viral clearance; Analysis: risk of publication bias.**

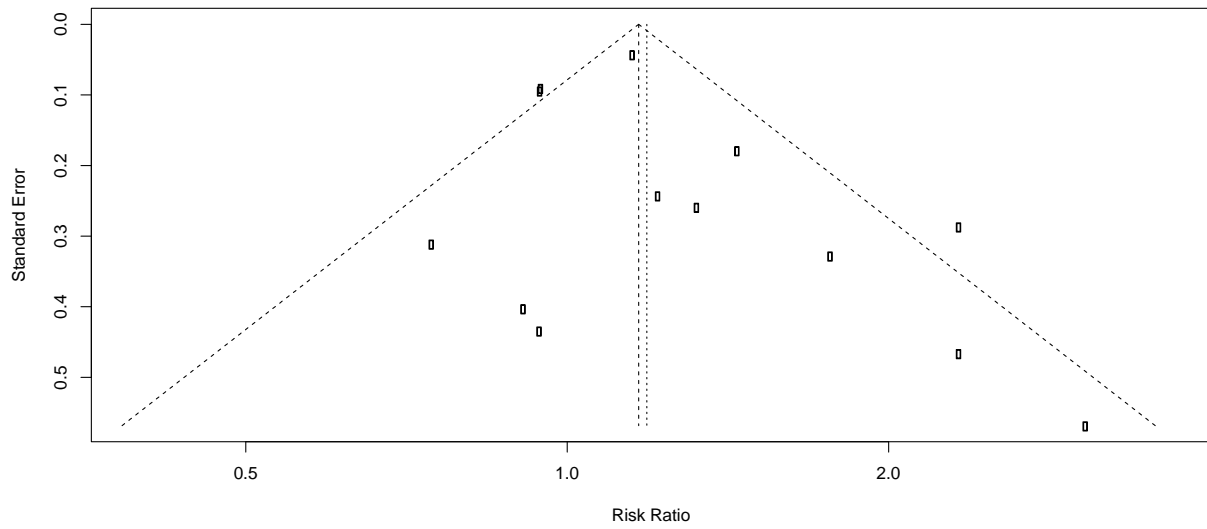

Supplement: Supplementary file [file media-4.pdf]
