# Supplementary material for: Bias as a source of inconsistency in ivermectin trials for COVID-19: A systematic review
Source: bioRxiv or medRxiv preprint supplement (doi:10.1101/2021.08.19.21262304), 2021-08-21

# S1 Figure. PRISMA (preferred reporting items for systematic reviews and meta-analyses)

## flowchart of study inclusions and exclusions

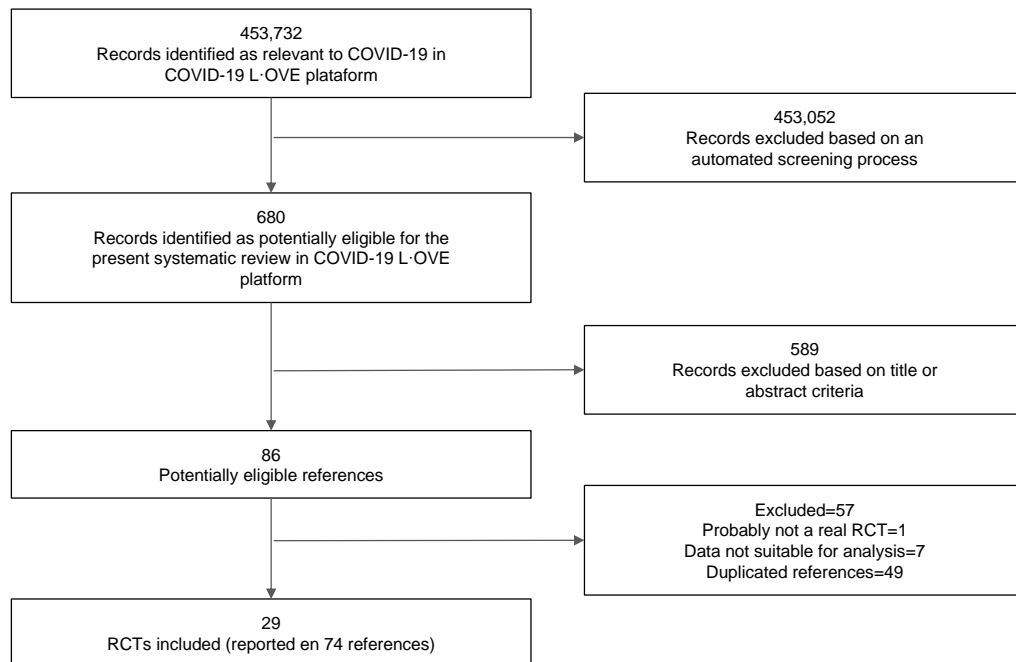

Supplement: Supplementary file [file media-2.pdf]
